# Supplementary material
Source: PubMed Central journal article supplement (PMC7745838)
Supplement: NIHMS1612080-supplement-1.pdf [file NIHMS1612080-supplement-1.pdf]

**Figure S1, related to Figure 1. Quality assessment and characterization of scRNA-Seq atlas of mouse LUAD progression.** (A) Substantial number of detected genes across samples. The distribution of the number of expressed genes post-QC filtering (*y* axis) in the cells from each 96-well plate processed (*x* axis). *T*, *KT* and *KPT*: tumor genotypes as described in the text; T#: tumor identification number; P#: plate number. (B) Number of cells (*y* axis) in each sample (*x* axis) that passed quality control (*y* axis, **STAR Methods**) and were retained for all further analyses. (C) Reproducibility across plates within a sample type. tSNE (as in **Figure 1D**), with cells (dots) colored by plate ID. (D) Top marker genes identified for each cluster. Top 50 genes sorted by area under the ROC-curve (rows) that are differentially expressed in each cluster (column) in **Figure 1D**. (E,F) Growing heterogeneity with tumor progression. (E) The number of cells and relative enrichment (Pearson's residual, calculated as  $(\text{observed number of cells} - \text{expected number of cells}) / \sqrt{\text{expected number of cells}}$ , where the expected value is calculated as the product of row and column marginal probabilities by total cells, color bar) from each cluster (rows, ordered by time of emergence) in each sample type (genotype/time point combination, columns), ordered by progression. (F) Transcriptional homogeneity decreases with tumor progression. Normalized Mutual Information (NMI, *y* axis) between cells within each individual sample, ordered temporally within a replicate experiment. Box plots: upper, median, lower quartile of 1,000 bootstrap samples, of 50 cells each, from the indicated time point; whiskers: 1.5 interquartile range. (G) Reproducibility of cell states across tumors and mice. tSNE of cell profiles (dots) as in **Figure 1D**, but showing only cells from *KPT* tumors that were individually microdissected at 30 weeks, with cells colored by tumor of origin. (H,I) Increased variability of CNVs with tumor progression. Distributions of the variability of CNVs (*y* axis) quantified by the biweight midvariance (a robust measure of scale), as inferred from scRNA-Seq data either across



all the cells from each time point/genotype combination (H,  $x$  axis) or within individual biological replicates or dissected tumors (I,  $x$  axis), ordered by progression. Time point color code as in **Figure 1C**. **(J)** CNVs and cell clusters do not naively align. CNVs (amplification: red; deletion: blue) across chromosomal positions (columns) inferred for each cell (row) from scRNA-Seq data, marked for time point and cell cluster (as in **Figure 1D**). **(K, L)** More examples of transcriptional heterogeneity not simply following genetic clonotype **(K)** Congruence between CNV profiles inferred from scDNA-Seq and scRNA-Seq. CNVs shown (as in **Figure 1H,I**) for single cells (rows) of two individually microdissected *KPT* tumors at 30 weeks profiled by scDNA-Seq (top) or scRNA-Seq (bottom). Left color bar: Predominant clonotypes identified from scDNA-Seq (top) and assigned to scRNA-Seq cells (bottom). Far left color bar in scRNA-Seq panels: cell cluster membership as in **Figure 1G**. **(L)** Matrices showing clonotype distribution across the transcriptionally distinct clusters. Relative enrichment (Pearson's residual) of clonotypes in different clusters ( $x$  axis) in *KPT* LUAD tumors. **(M)** Clonotypes match multiple transcriptional states. PHATE maps as in **Figure 1D**, colored by clonotype for each of the two tumors.

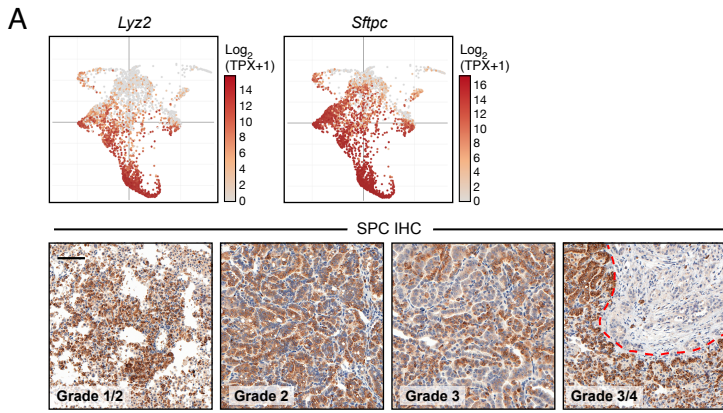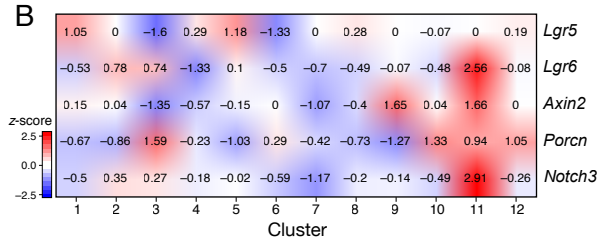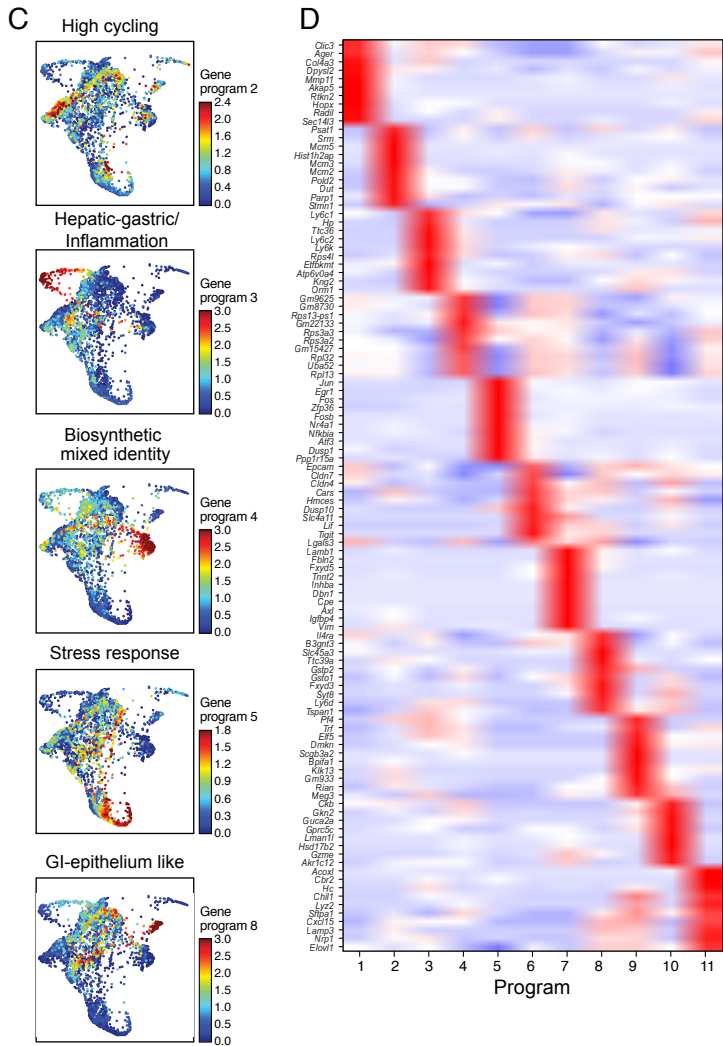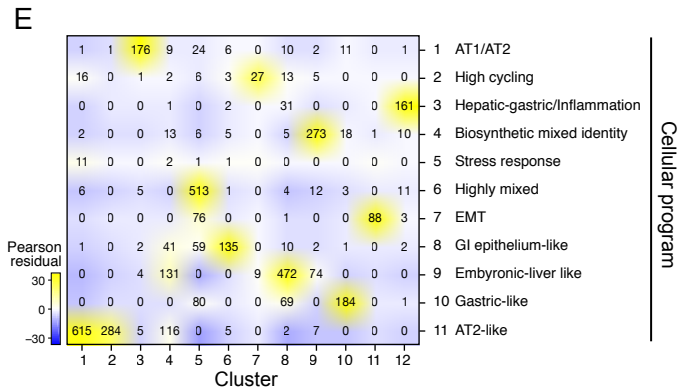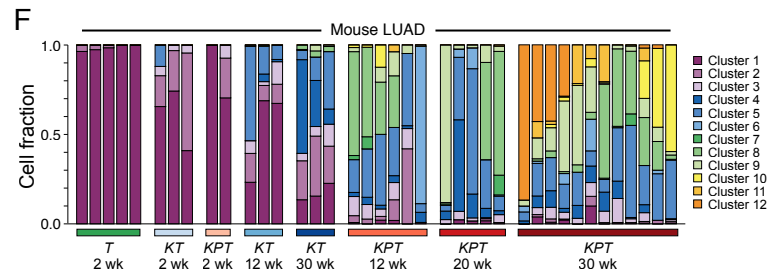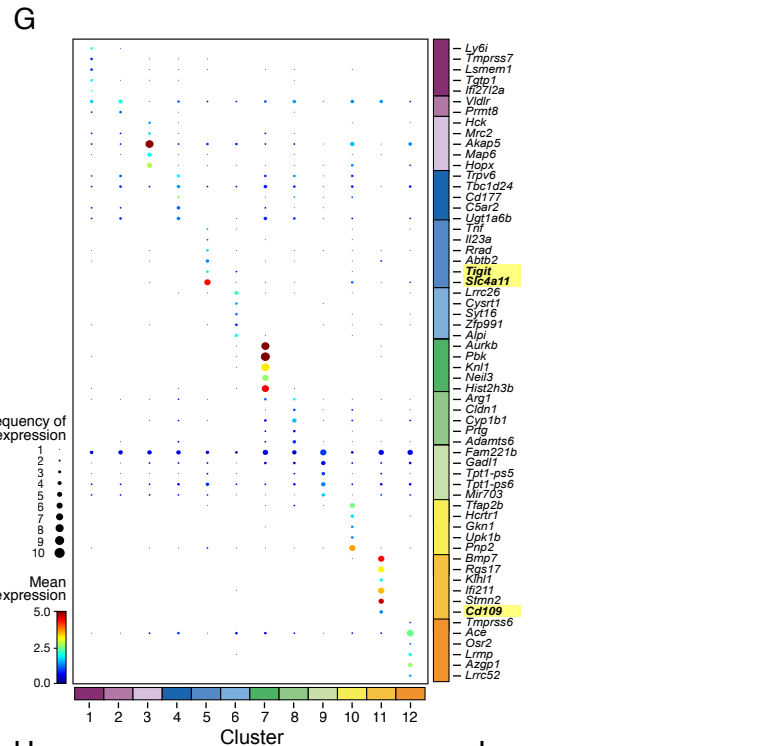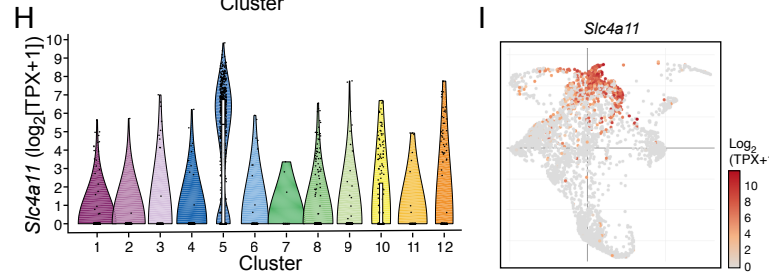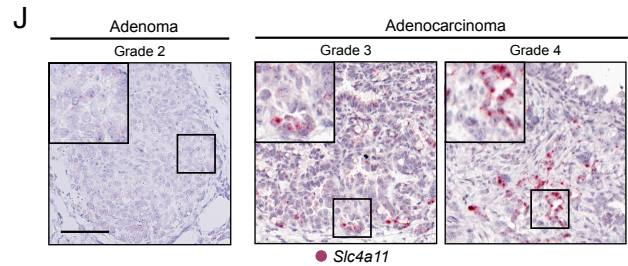

**Figure S2, related to Figure 2 and Table S2. Alternative cell type and cell transition programs arise during tumor progression.** (A) Loss of AT2 cell marker expression in a subset of LUAD cells during progression. Top: PHATE map (as in **Figure 1D**) of scRNA-seq profiles with cells (dots) colored by expression ( $\log_2(\text{TPX}+1)$ ) of the AT2 cell markers *Lyz2* and *Sftpc*. Bottom: Immunohistochemistry for surfactant protein-C (SPC), encoded by *Sftpc*, in mouse lung neoplasias. Red dashed line indicates boundary between grade 3 and grade 4 regions in right-most image. Scale bar: 100  $\mu\text{m}$ . (B) Regulators of alternative cell fate are expressed in late-emerging clusters. Mean expression (z-score on  $\log(\text{TPX}+1)$ ) of previously reported LUAD tumor cancer cell subpopulation markers (rows) across the clusters (columns). (C) Additional NMF programs arising from an analysis of the scRNA-Seq data (**STAR Methods**). (D) Activation weighted mean expression of top program genes. Mean expression (z-score value of expression weighted by the relative contribution to activation value for that program; color bar) of genes (rows) associated with one of the 11 programs (columns). (E) Comparison of cell cluster membership and top scoring NMF program. Shown is the count of each combination of cluster (columns) and program (rows, **Table S2**), colored by the deviation from expected (Pearson's residual). (F) Cell membership in clusters over time. Fraction of cells ( $y$  axis) from each cluster (color code, as in **Figure 1D**), in each individual sample ( $x$  axis). (G) Selected gene markers for clusters 5 and 11. Top five uniquely expressed genes (rows, **STAR Methods**) in each cluster (columns) (color bar, as in **Figure 1D**). Bold and highlighted: Markers chosen for cluster 5 (*Slc4a11*, *Tigit*) and 11 (*Cd109*). (H) Expression of *Slc4a11* across clusters ( $\log_2(\text{TPX}+1)$ ). (I) Expression of *Slc4a11* across cells in a PHATE map ( $\log_2(\text{TPX}+1)$ ). (J) RNA *in situ* hybridization for *Slc4a11* (purple) in mouse adenoma and adenocarcinoma tissues. Scale bar: 100  $\mu\text{m}$

A

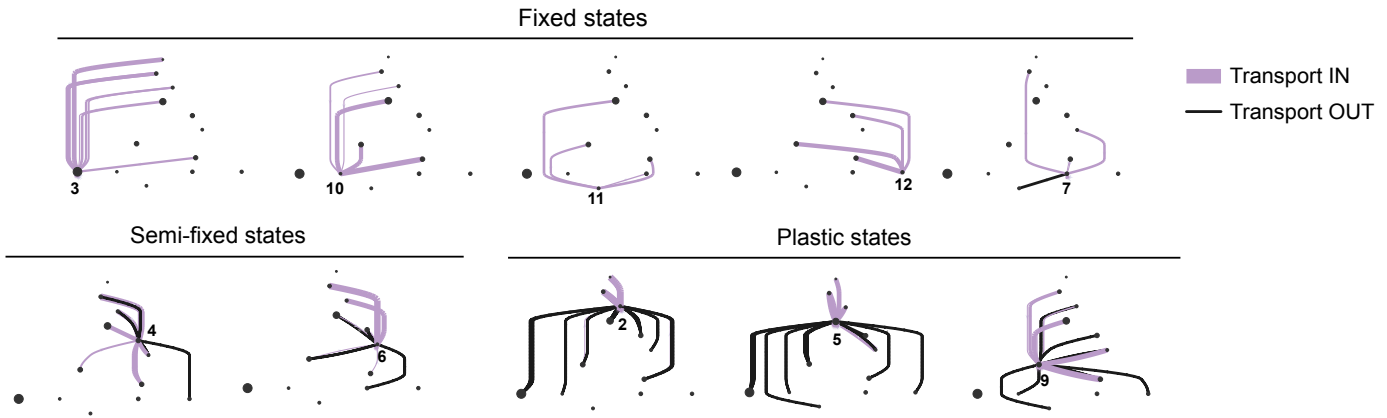

B

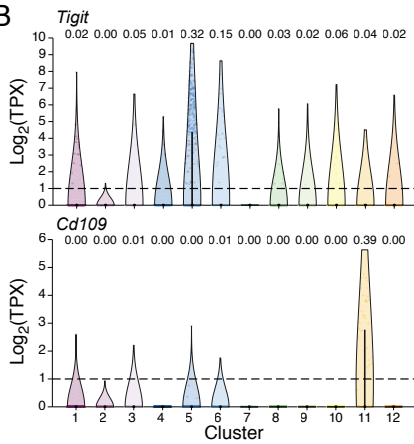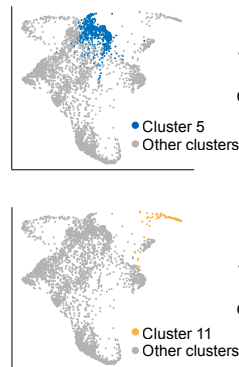

C

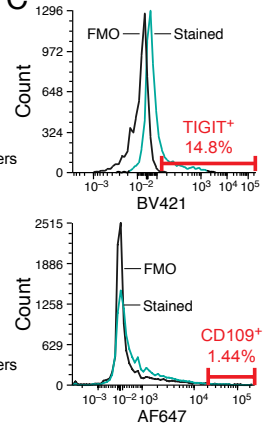

D

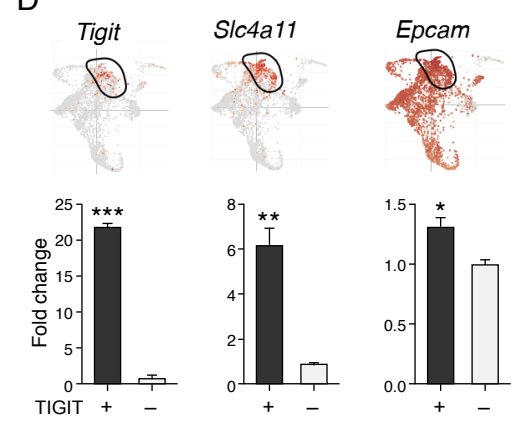

E

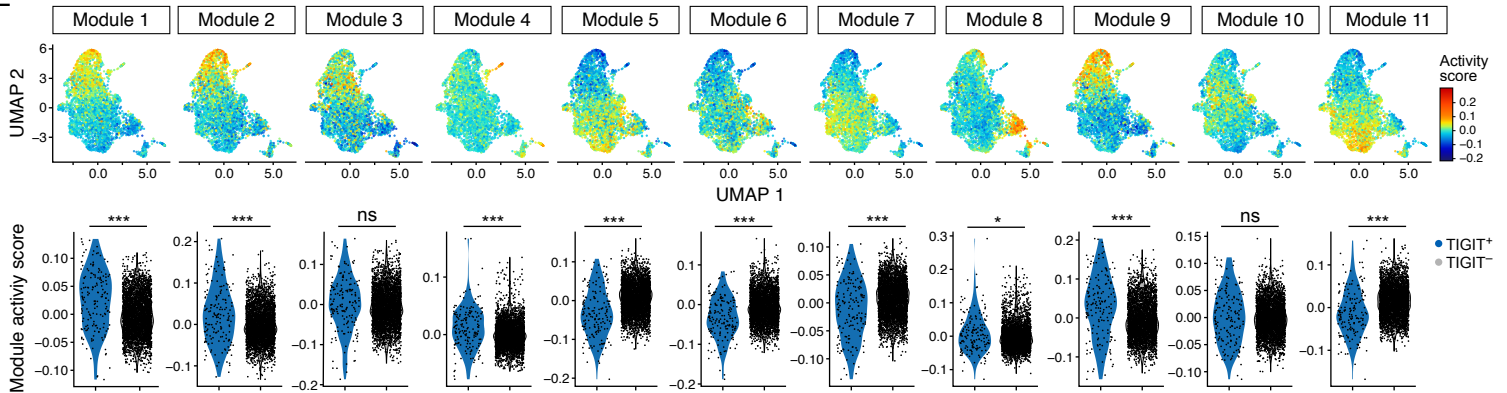

F

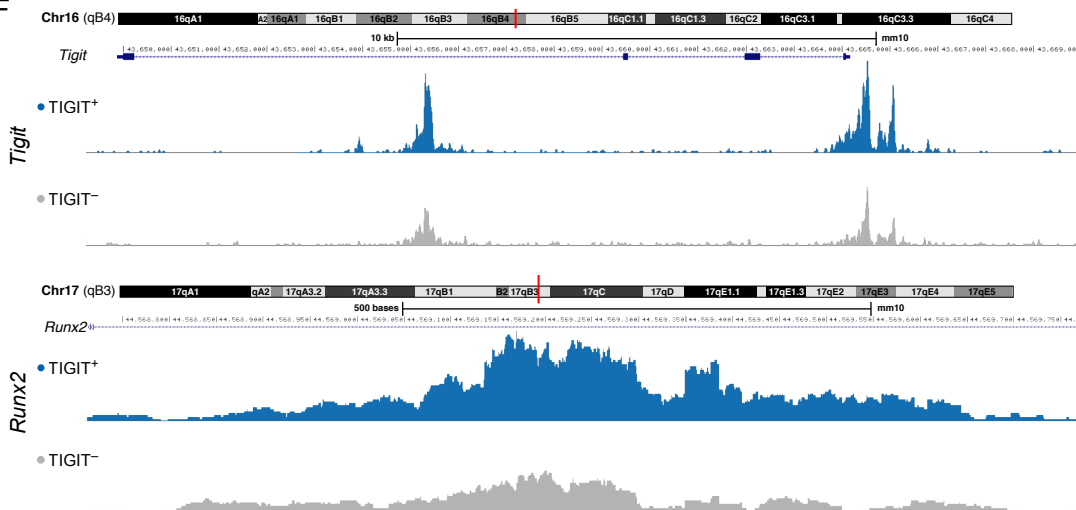

G

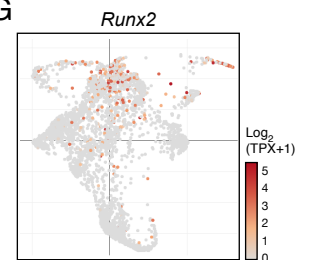

**Figure S3, related to Figure 3. TIGIT<sup>+</sup> mouse LUAD HPCS cells are plastic.** (A) Optimal transport model predicts fixed, semi-fixed, and plastic cell states. Optimal Transport graphs (as in **Figure 3A**), but showing all transitions (aggregate across all time points) to (black) and from (purple) the selected cluster's cells. (B) *Tigit* and *Cd109* expression mark cluster 5 and 11 cells, respectively. Left: distribution of expression levels ( $\log_2(\text{TPX}+1)$ , y axis) of *Tigit* (top) and *Cd109* (bottom) across the cells in each cluster (x axis). Right: PHATE map of scRNA-seq profiles (as in **Figure 1D**) with cells (dots) colored by *Tigit* (top) and *Cd109* (bottom) expression ( $\log_2(\text{TPX}+1)$ , color bar). (C) Isolation of TIGIT<sup>+</sup> and CD109<sup>+</sup> populations by FACS. FACS plot of the distribution of TIGIT (top) and CD109 (bottom) expression in either fluorescence minus-one (FMO, colored curves) or stained cells (black curves). Red: percentage of positive cells. (D) Prospective isolation of cluster 5 cells by TIGIT expression. Top: PHATE map embedding (as in **Figure 1D**) with cells (dots) colored by the expression of each gene. Bottom: Mean RNA levels (y axis, quantitative PCR) of cluster 5 markers *Tigit*, *Slc4a11*, and the epithelial marker *Epcam* in TIGIT<sup>+</sup> vs. TIGIT<sup>-</sup> LUAD cells (x axis) isolated at 17-22 weeks following tumor initiation. Error bars: standard deviation,  $n = 4$ . \*  $p < 0.05$ ; \*\*  $p < 0.01$ ; \*\*\*  $p < 0.001$  (unpaired  $t$  test). (E) scATAC-Seq data showing gene activity for modules from the accompanying LaFave et al. manuscript. (top) UMAP representation of TIGIT<sup>+</sup> and TIGIT<sup>-</sup> sorted cells subjected to scATAC-Seq with gene activity as depicted by the scale bar. (bottom) Violin plot representation for the same data with TIGIT<sup>+</sup> and TIGIT<sup>-</sup> separated. \*  $p < 0.05$ ; \*\*  $p < 0.01$ ; \*\*\*  $p < 0.001$  Wilcoxon rank sum test. (F) Representative bulk ATAC-Seq peak data showing enrichment of accessible peaks in the TIGIT<sup>+</sup> over the TIGIT<sup>-</sup> sample for representative genes *Tigit* and *Runx2*. (G) Expression level of *Runx2* projected onto the PHATE map as in **Figure 1D**.



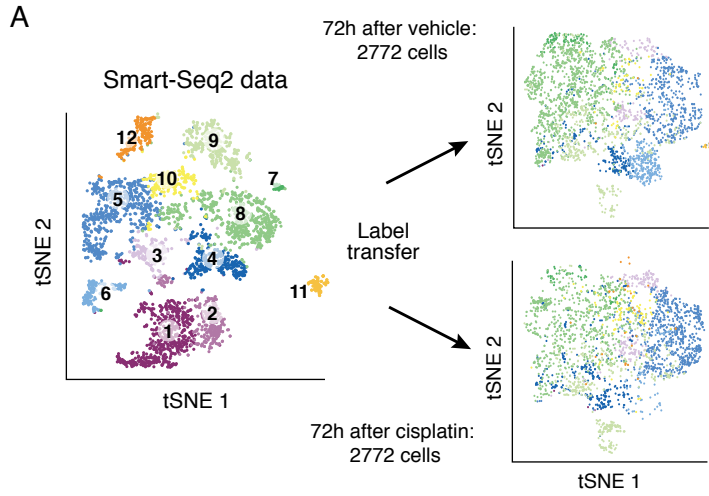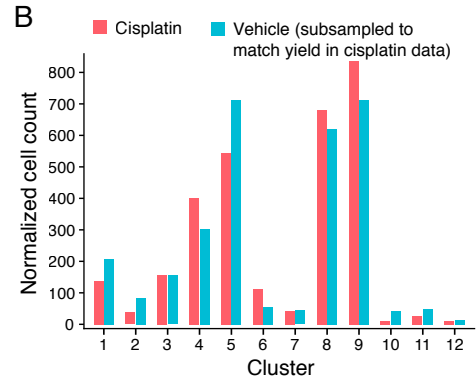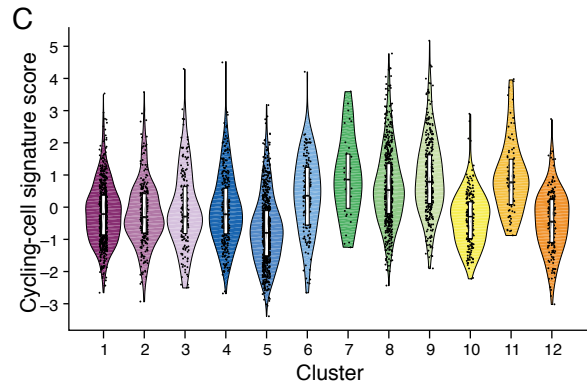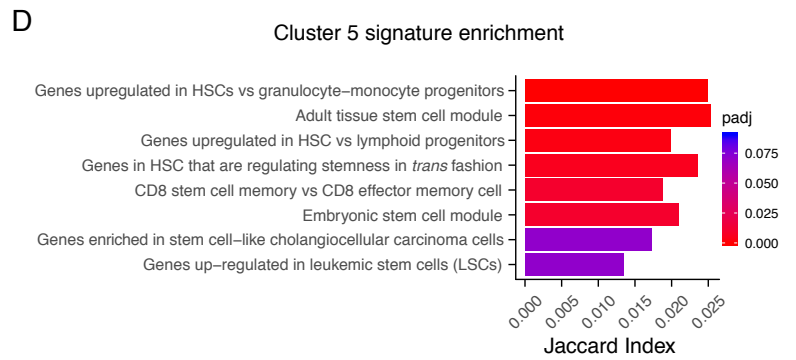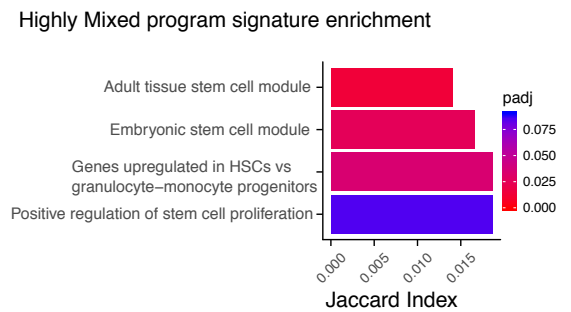

**Figure S4, related to Figure 5 and Table S4. Cells in the HPCS associate with chemoresistance, quiescence and metastasis.** (A) Annotation of cell profiles collected after cisplatin treatment with cell cluster labels from the LUAD progression atlas. tSNE of scRNA-Seq profiles from the LUAD progression data (right), with cells (dots) colored by clusters (as in **Figure 1D**), showing the cells collected after vehicle (top) or cisplatin (bottom) treatment, with cells (dots) colored by classifier predicted of cluster labels from the LUAD progression data (**STAR Methods**). Vehicle cells were subsampled to 2,772 to match cisplatin treatment cell yield. Both vehicle and cisplatin treated cells were collected from microdissected *KPT* tumors at 20 weeks post-tumor initiation 72 hours following a single dose of vehicle and cisplatin (n = 2 mice per condition). (B) Normalized cell count of cells in each cluster after chemotherapy treatment. (C) Distribution of gene-set signature scores of cell-cycle related genes, z-score (y axis) per cluster (x axis). The “Cycling cell” signature from the Mouse Cell Atlas study (Han et al., 2018) was used. (D) MSigDB (Liberzon et al., 2011; Subramanian et al., 2005) stemness signatures significantly enriched (FDR adjusted p value <0.1) in cluster 5 (top) and the Highly mixed program (NMF 6, bottom). Signatures are ranked by p value (color bar) and the length of the bar corresponds to the Jaccard Index.

A

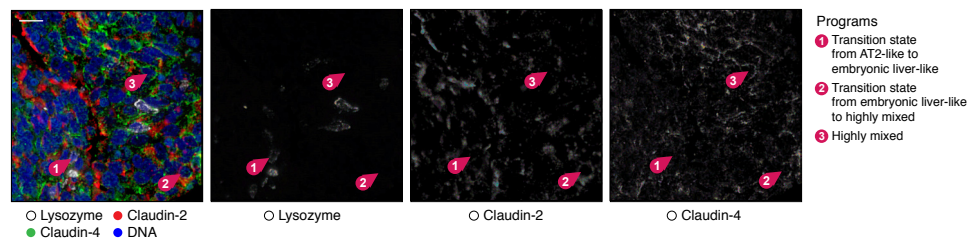

B

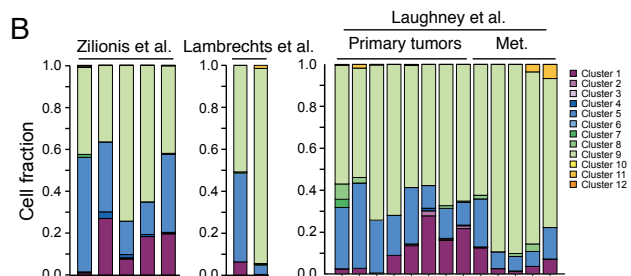

C

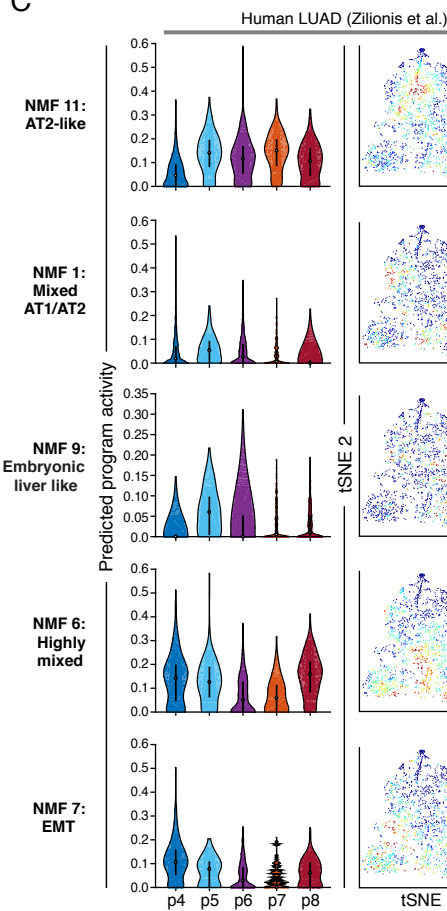

D

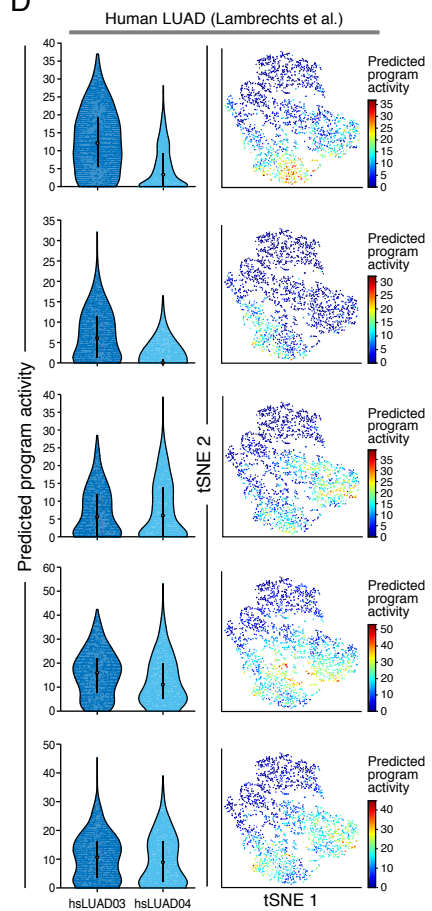

E

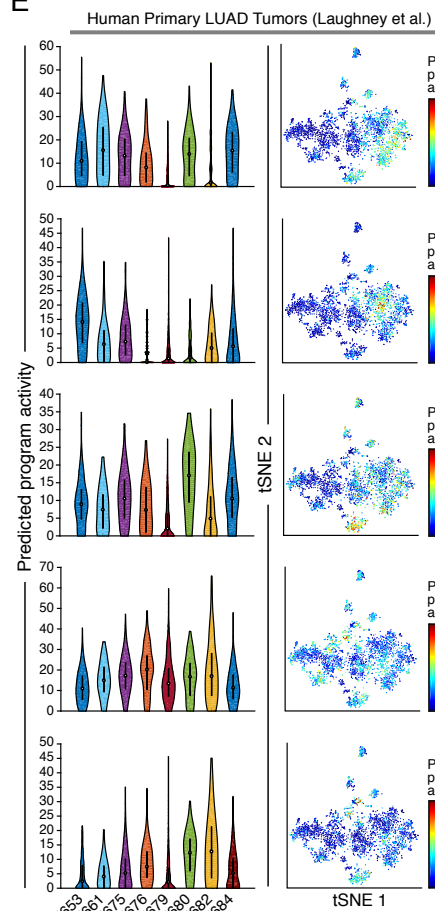

F

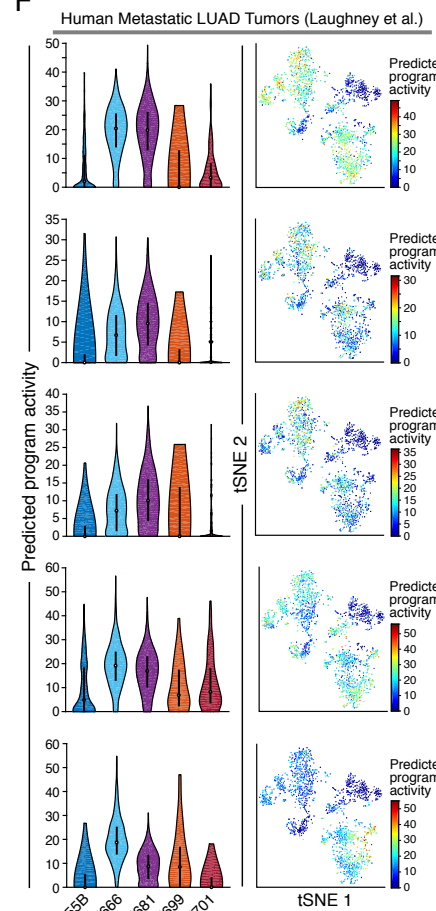

G

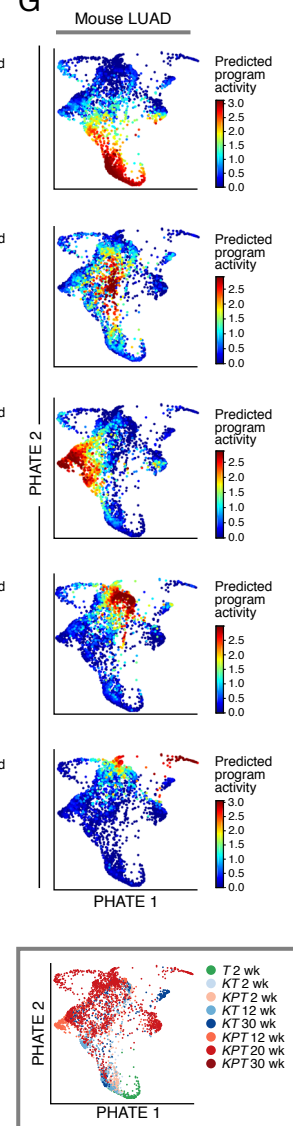

H

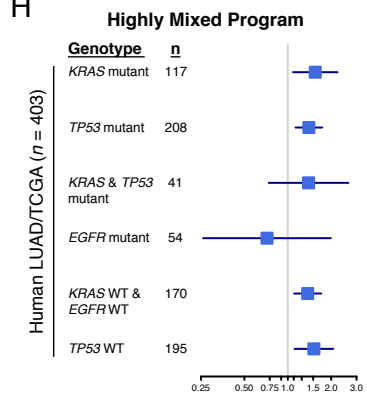

I

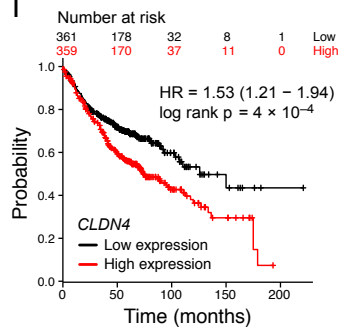

**Figure S5, related to Figure 6. Human LUAD cancer cells express key transcriptional programs derived from the mouse model.** (A) HPCS markers are expressed in human LUAD *in situ*. Immunofluorescence staining for Lysozyme (AT2-like program), Claudin-2 (Embryonic liver-like), and Claudin-4 (Highly mixed program), along with DNA visualized by DAPI staining. Pink numbered arrowheads indicate cell states or transitions predicted by the mouse model. Scale bar: 20  $\mu\text{m}$ . **(Figure 2D-F):** 1 - AT2-like (lysozyme) to Embryonic liver-like (claudin-2) transition; 2 - Embryonic liver-like (claudin-2) to Highly mixed (claudin-4) transition; 3 - Highly mixed program (claudin-4). LUAD tissue from a 72-year old male operated at the University of Vanderbilt-Ingram Cancer Center (Stage I (pT1a)) (Amin et al., 2017)). **(B)** Some mouse LUAD cell cluster signatures are detected in human LUAD. Fraction of cells (*y* axis) from each tumor (*x* axis) that express the signature of each cluster (color legend, **STAR Methods**). For simplicity, unclassified cells are not displayed. **(C-G)** Activation program scores of mouse LUAD programs in individual malignant cells from human LUAD tumors. For each of the five main programs detected in mouse LUAD, shown are violin plots (left) of the distribution of program scores (*y* axis) of in the cancer cells in each tumor (*x* axis), and a tSNE of the cell profiles (right), with cells (dots) colored by their program scores, and by the patient identity (bottom framed panel) in each of three scRNA-Seq studies of cancer cells from human LUAD tumors [(C), (D), (E), (F), (Lambrechts et al., 2018; Laughney et al., 2020; Zilionis et al., 2019)], as well as a PHATE map of mouse LUAD cells (G), colored by the program scores (as in **Figure 2D**), and by timepoint/genetic combination (bottom framed panel). **(H)** Analysis of TCGA data shows the Highly Mixed program is associated with worse prognosis for patients irrespective of *KRAS* and/or *TP53* mutations. WT: wild-type. **(I)** High expression of the HPCS marker *CLDN4* is associated

with poor survival. Kaplan-Meier curve of patients stratified by high (red) vs. low (black) expression of *CLDN4* (Gyorffy et al., 2013).



**A**

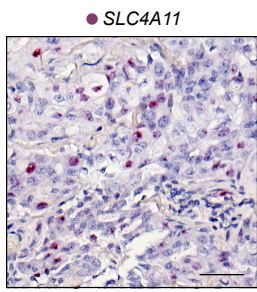

**B**

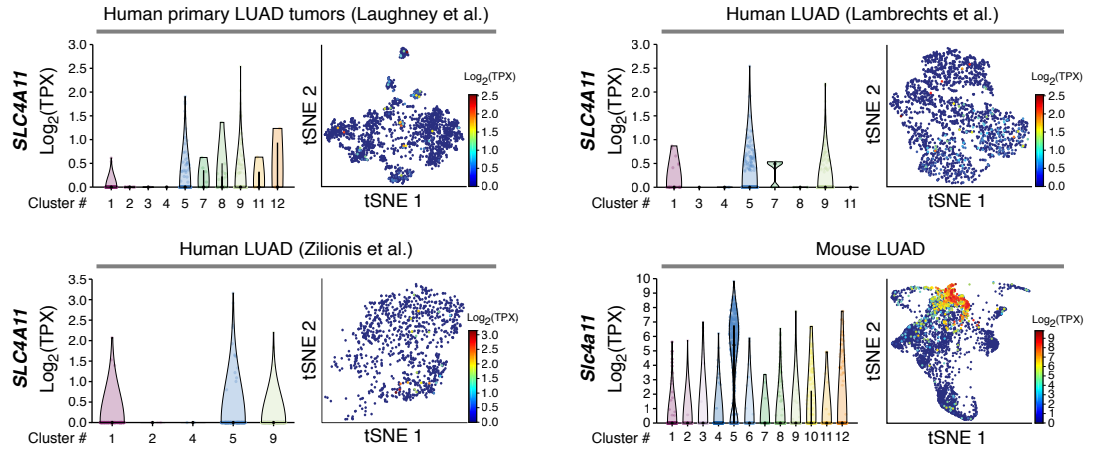

**C**

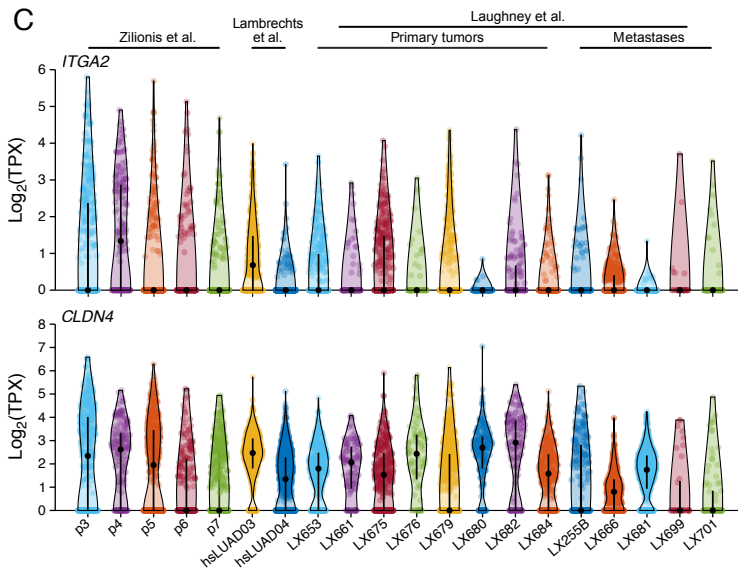

**D**

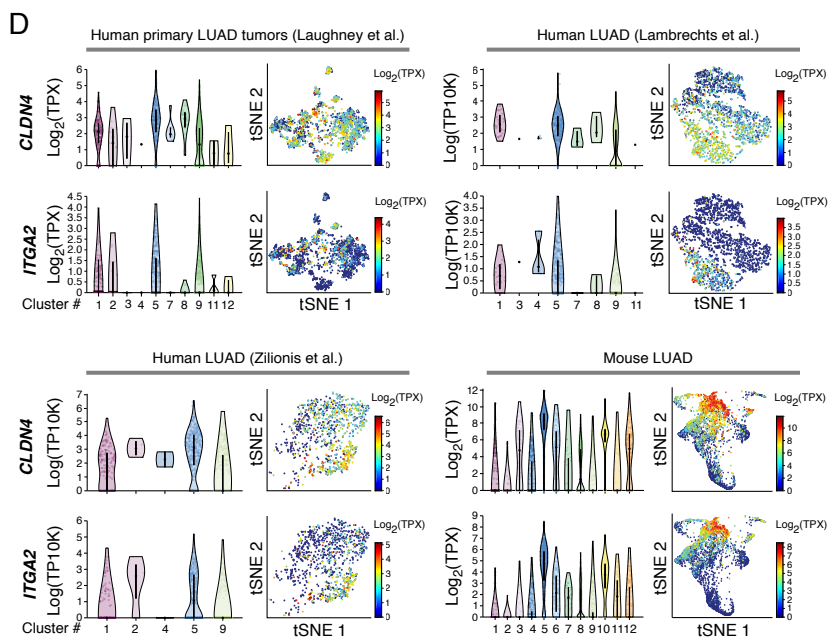

**E**

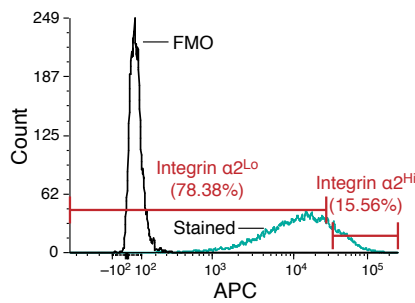

**F**

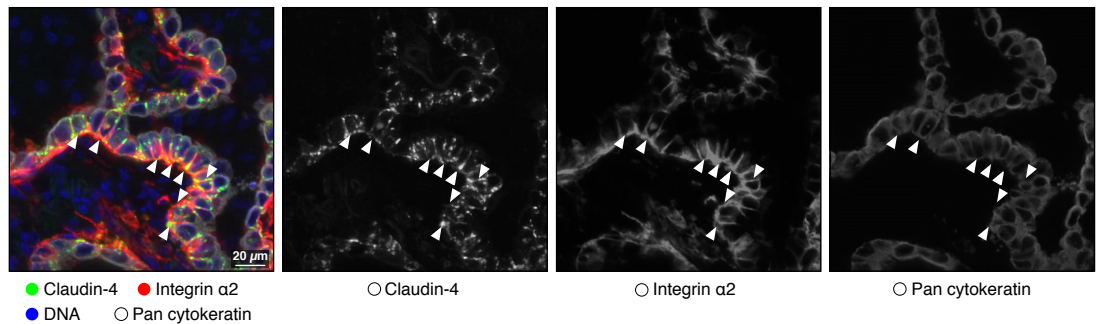

**G**

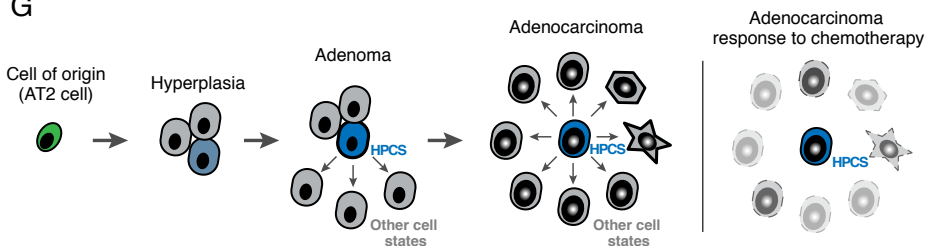

**Figure S6, related to Figure 7, Table S1, and Table S3. Markers for the HPCS in mouse LUAD identify a similar state in human LUAD.** (A) RNA *in situ* hybridization of *SLC4A11* in a human LUAD tumor from an 81-year old female patient operated at Memorial Sloan Kettering Cancer Center (Stage IIB (pT2bN1) (Amin et al., 2017), genotype *KRAS**p.G12A*; *TP53**p.P278S*). Scale bar: 50  $\mu$ m. (B) Violin plots showing the expression levels of *SLC4A11* or *Slc4a11* in various clusters from primary human (left) and mouse (right) LUAD tumors. (C) Violin plots of expression levels for *ITGA2* and *CLDN4* in 15 primary human LUAD tumors and 8 metastases. (D) Expression of HPCS signature genes in human tumors. Distribution of expression levels (*y* axis,  $\log_2$ (TPX), violin plots), and in tSNE plots of two signature genes of mouse HPSC in tumor cells (*x* axis, **STAR Methods**) from three human data sets or from mouse. (E) FACS plot of the distribution of Integrin  $\alpha 2^{\text{Hi}}$  and Integrin  $\alpha 2^{\text{Lo}}$  expression in either fluorescence minus-one (FMO, black curve) or stained cells (colored curve). Red: percentage of positive cells. (F) Immunofluorescence for Claudin-4 and Integrin  $\alpha 2$  (both markers of the Highly mixed cell state) along with pan-cytokeratin. DNA visualized by DAPI staining. White arrow: a Claudin-4 and Integrin  $\alpha 2$  double positive cancer cell. (G) Model. LUAD initiates in AT2 cells of the lung, giving rise to adenomatous atypical hyperplasia (AAH), which retain alveolar identity. Upon transition of AAH to adenoma, a high-plasticity cell state (HPCS, blue) emerges, which gives rise to multiple surrogate cancer cell identities (gray cells). The HPCS gives rise to identities with features of the lung lineage in adenomas, whereas in adenocarcinomas the HPCS produces phenotypes that resemble other endoderm-derived cells (such as embryonic liver and gastric epithelium) and finally gives rise to epithelial-to-mesenchymal transition (EMT).
